# Supplementary material for: PP2A subunit PPP2R2C is downregulated in the brains of Alzheimer’s transgenic mice
Source: publisher site journal article supplement (doi:10.18632/aging.103048), 2020-04-14
Supplement: Supplementary file [file aging-v12i8-103048-supplementary-material-SD1.pdf]

SUPPLEMENTARY FIGURES

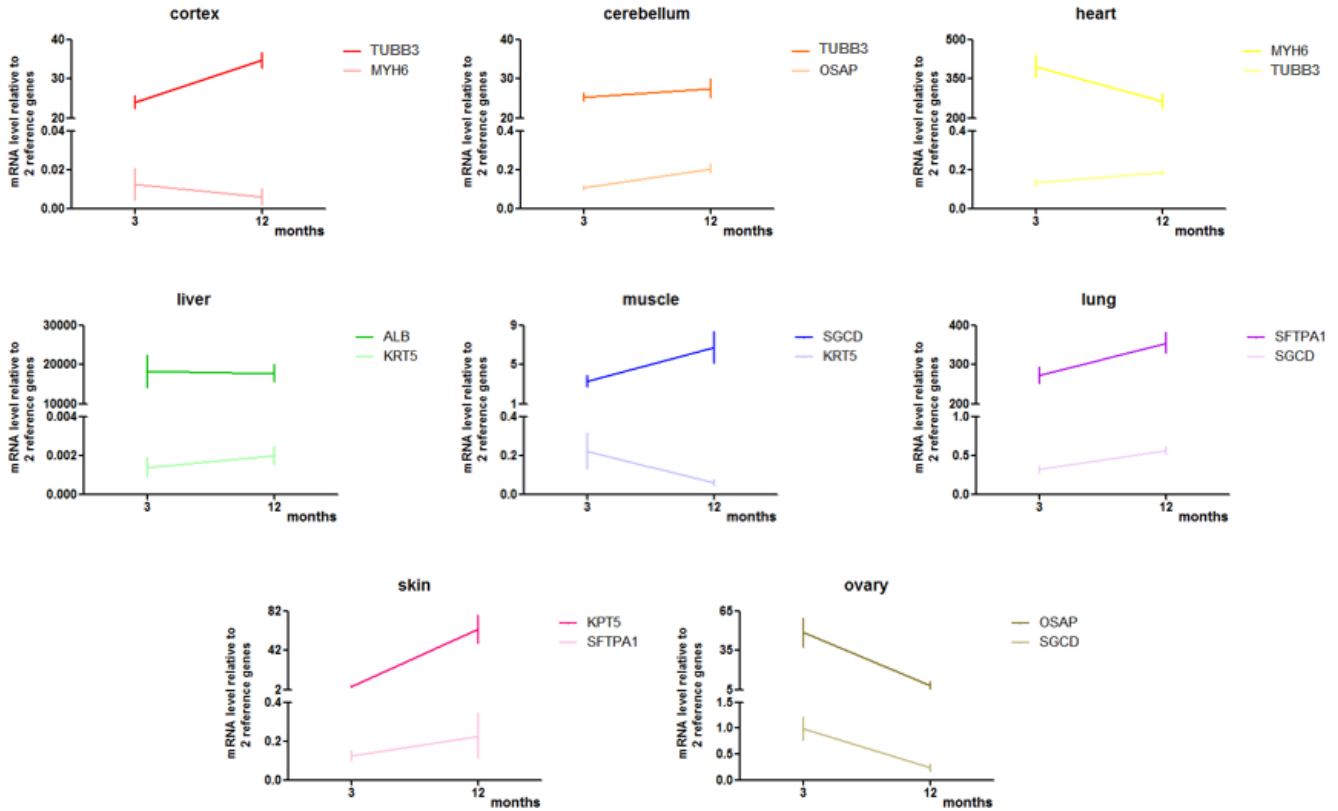

**Supplementary Figure 1. Expression of tissues specific markers in the dissected organs from wildtype mice at 3 and 12 months.** Quantitative RT-qPCRs for different mice organs was addressed by different tissue specific primers, including cortex, cerebellum, heart, liver, muscle, lung, skin and ovary from 3 months and 12 months, n=9 each. Data are presented at mean+/-SEM.

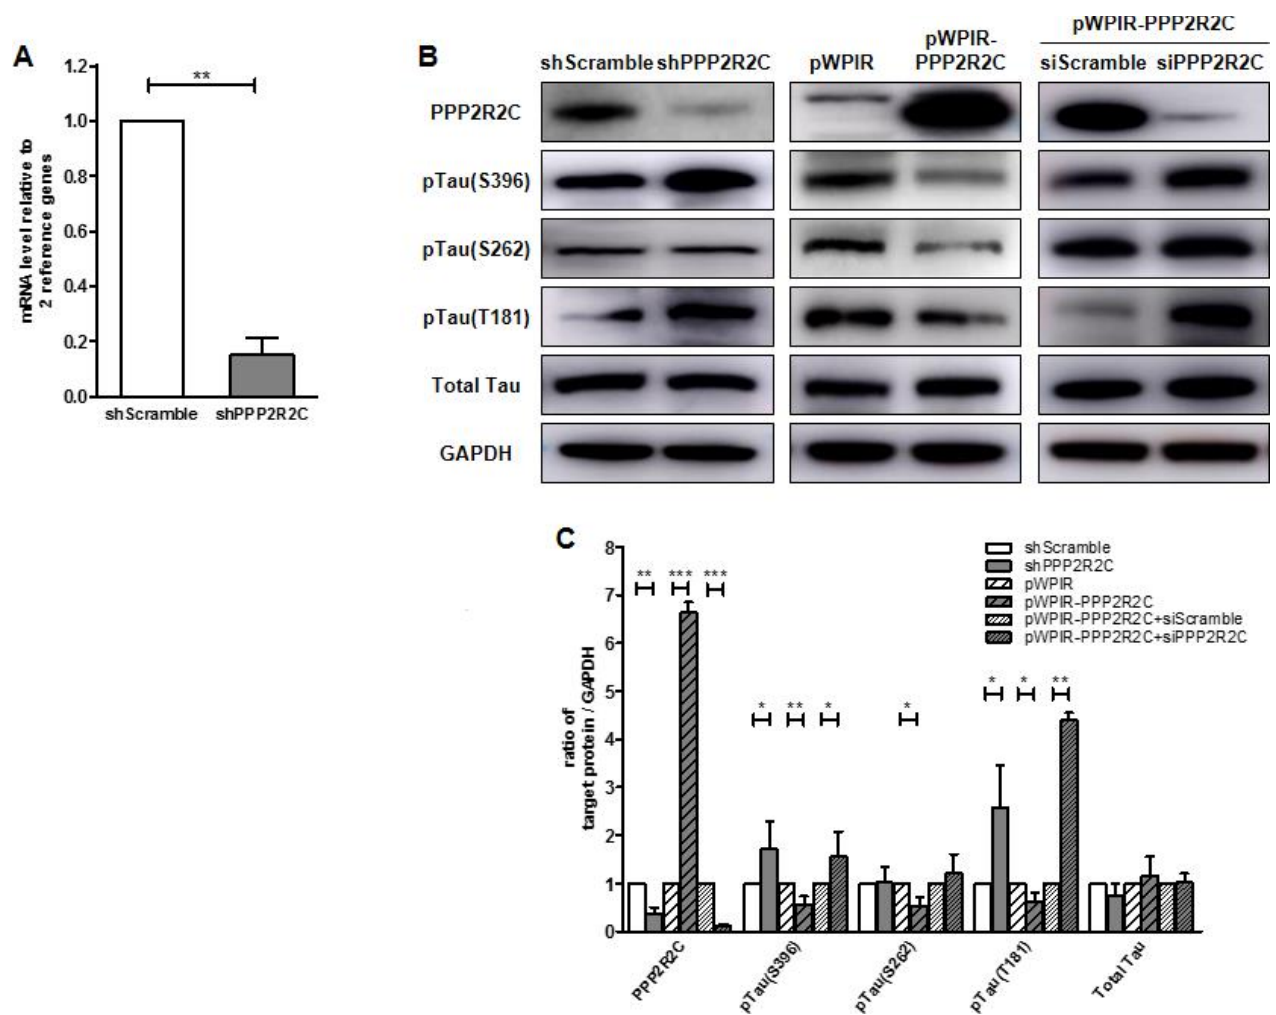

**Supplementary Figure 2. Specific regulation of PPP2R2C level in 293T cells triggers variation of Tau phosphorylation.** (A) Quantitative RT-qPCRs analyzing PPP2R2C RNA level in 293T cells after knockdown of PPP2R2C (n=3). (B) Representative images of Immunoblots of indicated antibodies are shown in 293T cell line after knockdown and overexpression PPP2R2C. (C) Associated quantifications in three independent experiments of (B). All data are presented at mean+/-SEM, n=3, \* p<0.05, \*\* p<0.01, \*\*\* p<0.001.
